# Supplementary material
Source: PubMed Central journal article supplement (PMC381220)
Supplement: bmj_328_7441_673__5.pdf [file bmj_328_7441_673__5.pdf]

**[Posted as supplied by the author]**

**List of deliberate errors in papers reviewed**

***Note:***

These are the major and minor errors inserted in the manuscripts to reflect the content of the training. There are other inconsistencies/ambiguities in the papers not listed but for the purpose of the study we were interested in the following.

***Are discharge summaries produced from databases better than those dictated from medical records?***

| Type of error                                              | Description                                                                                                                                                                                                                                                                                                                                                                                                      |
|------------------------------------------------------------|------------------------------------------------------------------------------------------------------------------------------------------------------------------------------------------------------------------------------------------------------------------------------------------------------------------------------------------------------------------------------------------------------------------|
| <u>Major errors</u>                                        |                                                                                                                                                                                                                                                                                                                                                                                                                  |
| Poor justification for study                               | Little justification for the need of the study [Introduction]                                                                                                                                                                                                                                                                                                                                                    |
| Biased randomisation procedure                             | Randomisation procedure sub-optimal (alphabetic) [Methods]                                                                                                                                                                                                                                                                                                                                                       |
| No sample size calculation                                 | No sample size justification / calculation [Methods]                                                                                                                                                                                                                                                                                                                                                             |
| Unknown reliability & validity of outcome measure          | Unknown reliability and validity of the assessment form [Methods]                                                                                                                                                                                                                                                                                                                                                |
| Failure to analyse the data on an Intention-to-treat basis | Intention-to-treat analysis would have been appropriate not "inappropriate" [Discussion]                                                                                                                                                                                                                                                                                                                         |
| Poor response rate                                         | Poor response rate for summaries (151 / 302 =50%) [Results]                                                                                                                                                                                                                                                                                                                                                      |
| Unjustified conclusions                                    | Generalisability of results unfounded. Results are based on one teaching hospital with general medical patients; conclusions state that the use of computer databases to create hospital discharge summaries should be implemented widely [Abstract & Discussion]                                                                                                                                                |
| Discrepancy between abstract & results                     | <ul style="list-style-type: none"> <li>• 70.6% in Abstract versus 79.6% in Results for summary generation</li> <li>• Abstract states no difference in assessments of timeliness, but Results says GPs gave higher ratings to database</li> <li>• Figures are reported in the Abstract on outcomes that are not reported in the Results section e.g. ratings of completeness, organisation and quality</li> </ul> |
| Inconsistent denominator                                   | Inconsistency throughout the paper about the number of discharge summaries (293, or 299, or 302, etc)                                                                                                                                                                                                                                                                                                            |
| <u>Minor errors</u>                                        |                                                                                                                                                                                                                                                                                                                                                                                                                  |
| No ethics approval                                         | No explicit ethics approval [Methods]                                                                                                                                                                                                                                                                                                                                                                            |
| No explanations for ineligible or non-randomised cases     | <p>No explanation for ineligible or non-randomised patients [Figure1, Results]</p> <ul style="list-style-type: none"> <li>• n=17 admitted but not eligible for randomised</li> <li>• n=54 eligible for randomisation but not randomised</li> </ul>                                                                                                                                                               |

|                                                                  |                                                                                                                                                                                                                                                                                                                   |
|------------------------------------------------------------------|-------------------------------------------------------------------------------------------------------------------------------------------------------------------------------------------------------------------------------------------------------------------------------------------------------------------|
| Inconsistency between text & tables                              | <p>Inconsistency between text and tables:</p> <ul style="list-style-type: none"> <li>• Results should state 14 not 15 items with a significant difference between groups as in Table 2</li> <li>• Results should state 10 not 7 items were more commonly cited in the database summaries as in Table 2</li> </ul> |
| Word reversal in text leading to wrong interpretation of results | Wrong interpretation: database-generated summaries were shorter not longer [Results, Discussion]                                                                                                                                                                                                                  |
| No mention of Hawthorne effect                                   | No mention of possible Hawthorne effect (on dictated summaries). Patients may have behaved differently as they knew they were taking part in study. [Discussion]                                                                                                                                                  |
|                                                                  |                                                                                                                                                                                                                                                                                                                   |

***The effect of a personalised computer-generated health record compared with a standard explanatory booklet on recruitment to health checks in general practice***

| Type of error                                              | Description                                                                                                                                                                                                                                                                                                                       |
|------------------------------------------------------------|-----------------------------------------------------------------------------------------------------------------------------------------------------------------------------------------------------------------------------------------------------------------------------------------------------------------------------------|
| <u>Major errors</u>                                        |                                                                                                                                                                                                                                                                                                                                   |
| Poor justification for study                               | Little justification for the need of the study [Introduction]                                                                                                                                                                                                                                                                     |
| Biased randomisation procedure                             | Randomisation procedure sub-optimal (family name) [Methods]                                                                                                                                                                                                                                                                       |
| No sample size calculation                                 | No sample size justification / calculation [Methods]                                                                                                                                                                                                                                                                              |
| Unknown reliability & validity of outcome measure          | Unknown reliability and validity of the questionnaire [Methods]                                                                                                                                                                                                                                                                   |
| Failure to analyse the data on an Intention-to-treat basis | Intention-to-treat analysis should have been conducted. The investigator's stated "we confined our analyses to the 414 patients who responded to the initial questionnaires as the non-responders were almost certainly not interested in having a health check". [Discussion]                                                    |
| Poor response rate                                         | Poor response rate (414/850=49%) [Abstract]                                                                                                                                                                                                                                                                                       |
| Unjustified conclusions                                    | Generalisability of results unfounded. Results are based on health promotion in one general practice; conclusions state CHR & booklet should be used in other areas of primary care other than health promotion such as chronic disease [Abstract, Discussion]                                                                    |
| Discrepancy between abstract & results                     | 414/850=49% response rate in Abstract and 551/850=65% in Results                                                                                                                                                                                                                                                                  |
| Inconsistent denominator                                   | Inconsistency throughout paper about number of respondents (551 or 414?, Tables 1 & 4 have different denominators)                                                                                                                                                                                                                |
| <u>Minor errors</u>                                        |                                                                                                                                                                                                                                                                                                                                   |
| No ethics approval                                         | No explicit ethics approval [Methods]                                                                                                                                                                                                                                                                                             |
| No explanations for ineligible or non-randomised cases     | <p>No explanation for ineligible or non-randomised patients [Figure1, Results]</p> <ul style="list-style-type: none"> <li>• 299 eligible patients who didn't complete questionnaire are not accounted for</li> <li>• 551 responses to baseline questionnaire but subgroups sum to n=414 (137 patients unaccounted for)</li> </ul> |
| Inconsistency between text & tables                        | Inconsistency between text and tables:                                                                                                                                                                                                                                                                                            |

|                                                                  |                                                                                                                                                                                                                       |
|------------------------------------------------------------------|-----------------------------------------------------------------------------------------------------------------------------------------------------------------------------------------------------------------------|
|                                                                  | <ul style="list-style-type: none"> <li>• Results states 62% liked more information about their health, Table 3 states 52%</li> <li>• Results states 58-67% used the media, Table 2 states 54-67%</li> </ul>           |
| Word reversal in text leading to wrong interpretation of results | Wrong interpretation. In the Discussion it should say the CHR was significantly associated with attending health check <u>not</u> the CHR + booklet. Results section has correct interpretation of table [Discussion] |
| No mention of Hawthorne effect                                   | No mention of possible Hawthorne effect. Patients may have behaved differently from usual as they knew they were taking part in a study [Discussion]                                                                  |
|                                                                  |                                                                                                                                                                                                                       |

## ***The effect of patients with cancer holding their own records on communication and quality of life***

| <b>Type of error</b>                                       | <b>Description</b>                                                                                                                                                                                                                                                     |
|------------------------------------------------------------|------------------------------------------------------------------------------------------------------------------------------------------------------------------------------------------------------------------------------------------------------------------------|
| <u>Major errors</u>                                        |                                                                                                                                                                                                                                                                        |
| Poor justification for study                               | Little justification for the need of the study [Introduction]                                                                                                                                                                                                          |
| Biased randomisation procedure                             | Randomisation procedure sub-optimal (dependent on day of the week) [Methods]                                                                                                                                                                                           |
| No sample size calculation                                 | No sample size justification / calculation [Methods]                                                                                                                                                                                                                   |
| Unknown reliability & validity of outcome measure          | Unknown reliability and validity of the instrument measuring quality of life or the 7-item questionnaire about satisfaction and communication [Methods]                                                                                                                |
| Failure to analyse the data on an Intention-to-treat basis | Intention-to-treat analysis would have been appropriate [Discussion]                                                                                                                                                                                                   |
| Poor response rate                                         | Poor response rate (450/850=53%) [Results]                                                                                                                                                                                                                             |
| Unjustified conclusions                                    | Generalisability of results unfounded. Results are based only on a sample of radiotherapy patients and possibly from one provider; conclusions state that such an innovation should not be pursued in providing hospital-based care [Abstract, Discussion]             |
| Discrepancy between abstract & results                     | Response rate is reported as 450/574=78% in Abstract and 450/850=53% in Results                                                                                                                                                                                        |
| Inconsistent denominator                                   | <ul style="list-style-type: none"> <li>• The figures in Table 1 sum to n=325 not n=425 for RH and NC groups</li> <li>• The figures in Table 2 sum to n=206 not n=178 for RH group, and to n=244 not n=272 for NC group</li> </ul>                                      |
| <u>Minor errors</u>                                        |                                                                                                                                                                                                                                                                        |
| No ethics approval                                         | No explicit ethics approval [Methods]                                                                                                                                                                                                                                  |
| No explanations for ineligible or non-randomised cases     | <p>No explanation for ineligible or non-randomised patients [Figure1, Results]</p> <ul style="list-style-type: none"> <li>• 446 (1296-850) eligible patients were not randomised</li> <li>• Why were only n=574 questionnaires sent at 3m instead of n=850?</li> </ul> |
| Inconsistency between text & tables                        | <p>Inconsistency between text and tables:</p> <ul style="list-style-type: none"> <li>• Results states there are 8 symptoms, Table 3 lists 6 symptoms</li> </ul>                                                                                                        |

|                                                                  |                                                                                                                                            |
|------------------------------------------------------------------|--------------------------------------------------------------------------------------------------------------------------------------------|
| Word reversal in text leading to wrong interpretation of results | Wrong interpretation: RH group suffered significantly <u>less</u> not more from nausea & vomiting and constipation (see Table 3) [Results] |
| No mention of Hawthorne effect                                   | No mention of possible Hawthorne effect. Patients may have behaved differently as they knew they were taking part in study. [Discussion]   |
|                                                                  |                                                                                                                                            |
