# Supplementary material
Source: PubMed Central journal article supplement (PMC381220)
Supplement: bmj_328_7441_673__6.pdf [file bmj_328_7441_673__6.pdf]

**Review Quality Instrument (Version 3.2)\***  
**[Posted as supplied by the author]**

1. Did the reviewer discuss the importance of the research question?

|            |   |   |                       |   |   |  |
|------------|---|---|-----------------------|---|---|--|
|            | 1 | 2 | 3                     | 4 | 5 |  |
| Not at all |   |   | Discussed extensively |   |   |  |

2. Did the reviewer discuss the originality of the paper?

|            |   |   |                                       |   |   |  |
|------------|---|---|---------------------------------------|---|---|--|
|            | 1 | 2 | 3                                     | 4 | 5 |  |
| Not at all |   |   | Discussed extensively with references |   |   |  |

3. Did the reviewer clearly identify the strengths and weaknesses of the method (study design, data collection and data analysis)?

|            |   |   |               |   |   |  |
|------------|---|---|---------------|---|---|--|
|            | 1 | 2 | 3             | 4 | 5 |  |
| Not at all |   |   | Comprehensive |   |   |  |

4. Did the reviewer make specific useful comments on the writing, organisation, tables and figures of the manuscript?

|            |   |   |           |   |   |  |
|------------|---|---|-----------|---|---|--|
|            | 1 | 2 | 3         | 4 | 5 |  |
| Not at all |   |   | Extensive |   |   |  |

5. Were the reviewer's comments constructive?

|            |   |   |                   |   |   |  |
|------------|---|---|-------------------|---|---|--|
|            | 1 | 2 | 3                 | 4 | 5 |  |
| Not at all |   |   | Very constructive |   |   |  |

6. Did the reviewer supply appropriate evidence using examples from the paper to substantiate their comments?

|                           |   |                             |   |   |                            |  |
|---------------------------|---|-----------------------------|---|---|----------------------------|--|
|                           | 1 | 2                           | 3 | 4 | 5                          |  |
| No comments substantiated |   | Some comments substantiated |   |   | All comments substantiated |  |

7. Did the reviewer comment on the author's interpretation of the results?

|            |   |   |                       |   |   |  |
|------------|---|---|-----------------------|---|---|--|
|            | 1 | 2 | 3                     | 4 | 5 |  |
| Not at all |   |   | Discussed extensively |   |   |  |

8. How would you rate the quality of this review overall?

|      |   |   |           |   |   |  |
|------|---|---|-----------|---|---|--|
|      | 1 | 2 | 3         | 4 | 5 |  |
| Poor |   |   | Excellent |   |   |  |

\* van Rooyen S, Black N, Godlee F. Development of the Review Quality Instrument (RQI) for assessing peer reviews of manuscripts. J Clin Epidemiol 1999;52:625-9
